# Supplementary material for: MeCP2 gene therapy ameliorates disease phenotype in mouse model for Pitt Hopkins syndrome
Source: PubMed Central journal article supplement — Neurotherapeutics. 2024 Jun 14;21(5):e00376. doi: 10.1016/j.neurot.2024.e00376 (PMC11579869; doi:10.1016/j.neurot.2024.e00376), 2024-06-14
Supplement: mmc1.pdf [file mmc1.pdf]

## Supplementary Table 1: Primers used for qRT-PCR

| Gene                     | Primers (5' to 3')                                                | Product size (bp) | Reference sequence(s)                                                                                                  | References (if any) |
|--------------------------|-------------------------------------------------------------------|-------------------|------------------------------------------------------------------------------------------------------------------------|---------------------|
| <i>Tcf4</i><br>(exon 18) | Forward: CCCAGACCAAGCTCCTGATT<br>Reverse: CATGTGATTCGCTGCGTCTC    | 194               | NM_001083967.1                                                                                                         |                     |
| <i>Mecp2</i><br>(exon 4) | Forward: ATGAGACTGTGCTCCCCATC<br>Reverse: TTTTCTCACCAAGGGTGGAC    | 83                | NM_001110792.2<br>(human e1)<br>NM_004992.4<br>(human e2)<br>NM_001081979.2<br>(mouse e1)<br>NM_010788.4<br>(mouse e2) |                     |
| <i>Gapdh</i><br>(exon 6) | Forward: CGACTTCAACAGCAACTCCC<br>Reverse: GCCGTATTCATTGTCATACCAGG | 106               | NM_001289726.1                                                                                                         |                     |
