# Supplementary material for: MeCP2 gene therapy ameliorates disease phenotype in mouse model for Pitt Hopkins syndrome
Source: PubMed Central journal article supplement — Neurotherapeutics. 2024 Jun 14;21(5):e00376. doi: 10.1016/j.neurot.2024.e00376 (PMC11579869; doi:10.1016/j.neurot.2024.e00376), 2024-06-14
Supplement: mmc2.pdf [file mmc2.pdf]

**a**

| Biopsy    | Sex | Age (years) | Mutation             |
|-----------|-----|-------------|----------------------|
| Control 1 | f   | 8           |                      |
| Control 2 | f   | 8           |                      |
| Control 3 | m   | 10          |                      |
| Control 4 | f   | 64          |                      |
| Control 5 | m   | Adult       |                      |
| TCF4-1    | f   | 17          | c.1486+5 g>T         |
| TCF4-2    | m   | 11          | c.520C>T, p.Arg174X  |
| TCF4-3    | m   | 10          | del(18)(q21.2q21.32) |

**b****GFAP/Nestin**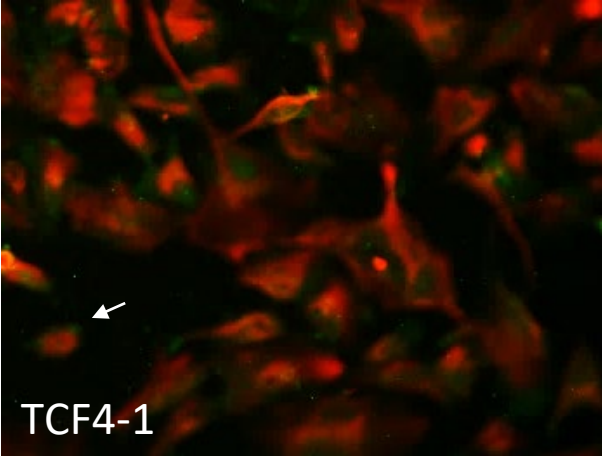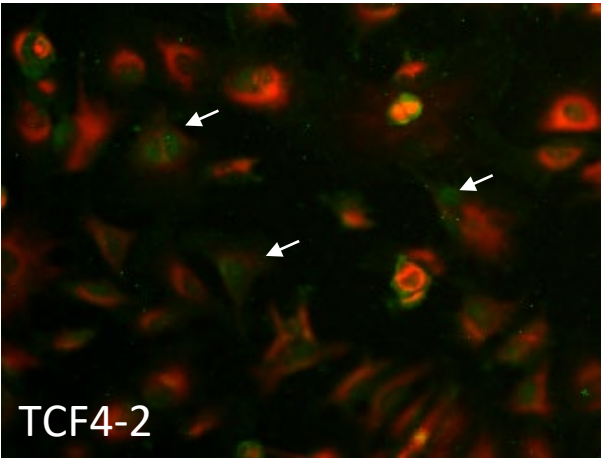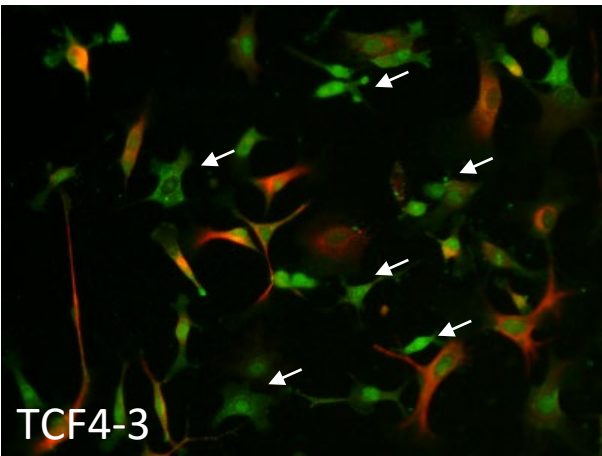**Supplementary Figure 1**
