# Supplementary figures and images for: MeCP2 gene therapy ameliorates disease phenotype in mouse model for Pitt Hopkins syndrome
Source: PubMed Central journal article supplement — Neurotherapeutics. 2024 Jun 14;21(5):e00376. doi: 10.1016/j.neurot.2024.e00376 (PMC11579869; doi:10.1016/j.neurot.2024.e00376), 2024-06-14

**a**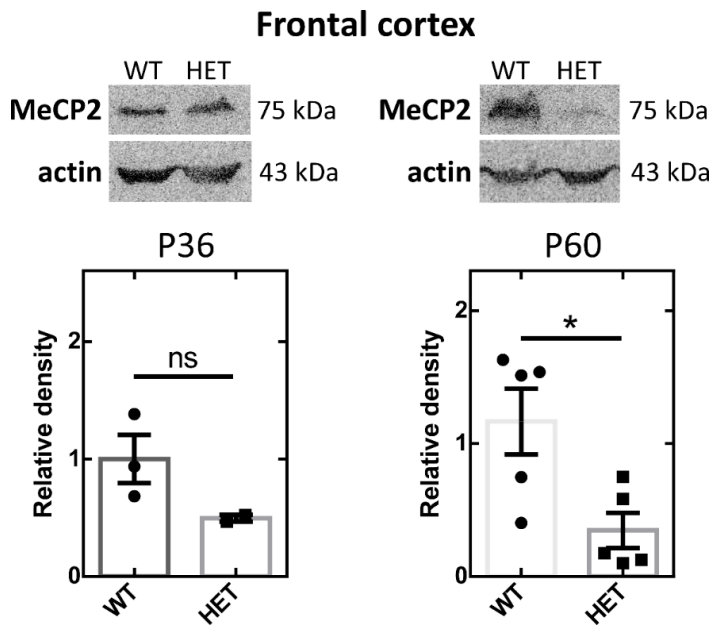**b**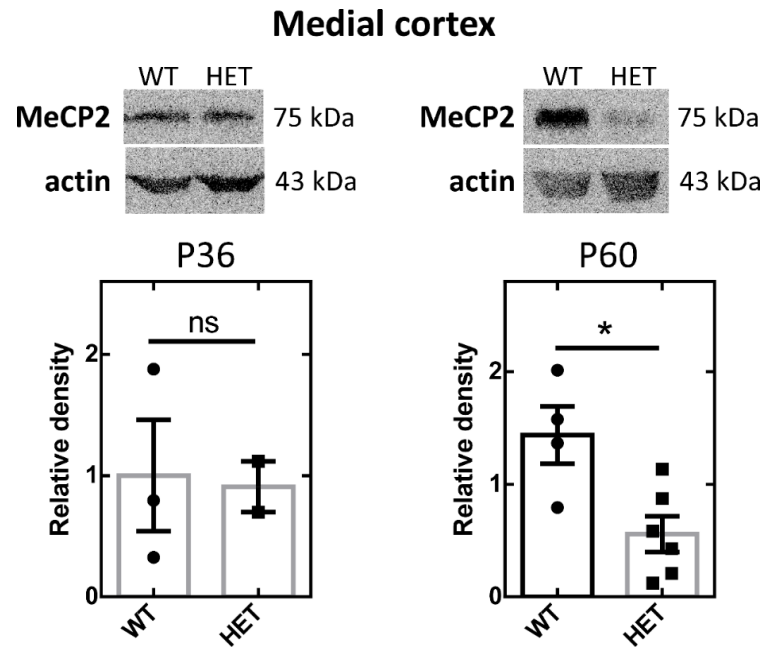

Supplementary Figure 2

Supplement: mmc3.pdf [file mmc3.pdf]

**a**

PCR for vector-derived transgene

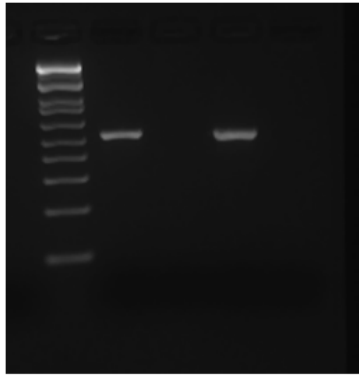

Control +  
Control -  
TCF4-3 +  
TCF4-3 -

**b**

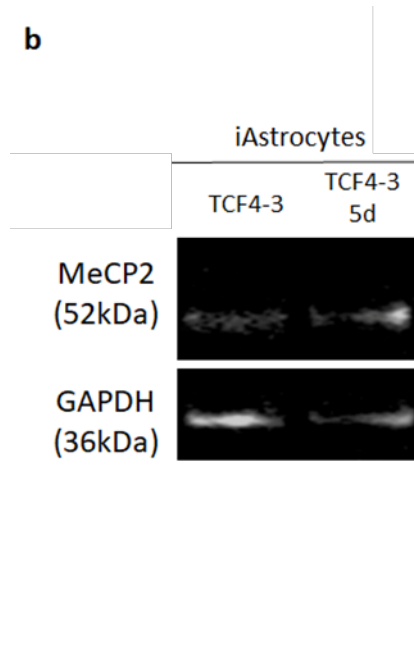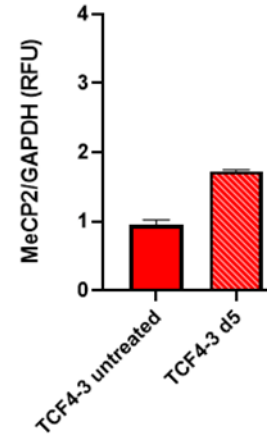

**Supplementary Figure 3**

Supplement: mmc4.pdf [file mmc4.pdf]
